# Supplementary material for: Propaganda, Presumed Influence, and Collective Protest
Source: Springer Nature journal article supplement (doi:10.1007/s11109-021-09683-0), 2021-02-08
Supplement: MOESM1 [file 18843698]

# Appendix Supplementary Materials

## Appendix.1 Survey Question Wording

- Pre-treatment background questions
  - *Life satisfaction*: “How satisfied are you with your life these days, all things considered?” The answers were on a five-point scale: “satisfied,” “somewhat satisfied,” “neither satisfied nor dissatisfied,” “somewhat dissatisfied,” and “dissatisfied.”
  - *National pride*: “How proud are you as a Chinese citizen?” The choices were on a four-point scale: “proud,” “somewhat proud,” “not very proud,” and “not proud.”
  - *Political interest*: “How interested are you in political affairs?” The choices were on a four-point scale: “interested,” “somewhat interested,” “not very interested,” and “not interested.”
  - *Pro-Western orientation*: “To what extent do you agree with the following statements: (1) we must strive to learn from Western culture and thoughts; and (2) we must strive to learn from Western political institutions.” The answers for both sub-questions were on a four-point scale: “agree,” “somewhat agree,” “somewhat disagree,” and “disagree.” Pro-Western orientation was constructed as the average of the two answers.
  - *System evaluation*: “How appropriate do you think our current political system is for the country?” The answers were on a four-point scale: “appropriate,” “somewhat appropriate,” “somewhat inappropriate,” and “inappropriate.”
- Outcome questions
  - *China situation*: “How satisfied are you with the overall current situation in China?” The answers were on a five-point scale: “satisfied,” “somewhat satisfied,” “neither satisfied nor dissatisfied,” “somewhat dissatisfied,” and “dissatisfied.”
  - *Future prospects*: “How optimistic are you about the overall prospects of China in 10 years?” The answers were on a four-point scale: “optimistic,” “somewhat optimistic,” “neutral,” and “not very optimistic,” and “not optimistic.”
  - *Governance*: “What do you think of our government’s ability in governing the country?” The answers were on a five-point scale: “high,” “somewhat high,” “neither high nor low,” “somewhat low,” and “low.”
  - *Responsiveness*: “To what extent do you agree with the following statement: Overall our government is working for the people and responsive to the needs of people.” The

answers were on a four-point scale: “agree,” “somewhat agree,” “somewhat disagree,” and “disagree.”

- *Stability*: “How strong do you think the government’s ability is in maintaining stability?” The answers were on a five-point scale: “strong,” “somewhat strong,” “neither strong nor weak,” “somewhat weak,” and “weak.”
- *Protest*: “If someone in your area calls for a ‘collective walk’ against the government’s malfeasance for the sake of justice and people’s rights, would you participate in it?” The answers were on a four-point scale: “yes,” “maybe,” “maybe not,” and “no.”

**Appendix.2 Demographics of Study Participants**

Table S1: Demographics of the Study Participants and Chinese Internet Users

| Demographics      |                         | Study Participants | 2018 CFPS (Internet Active Adults) | 2018 CNNIC |
|-------------------|-------------------------|--------------------|------------------------------------|------------|
| Gender            | Female                  | 54.3%              | 48.7%                              |            |
|                   | Male                    | 45.7%              | 51.3%                              |            |
| Age               | ≤ 19                    | 14.6%              | 4.5%                               |            |
|                   | 20-29                   | 48.4%              | 29.5%                              |            |
|                   | 30-39                   | 32.1%              | 27.7%                              |            |
|                   | 40-49                   | 4.1%               | 19.0%                              |            |
|                   | ≥ 50                    | 0.8%               | 19.2%                              |            |
| Education         | ≤ Primary school        | 0.5%               | 13.5%                              |            |
|                   | Junior high school      | 3.8%               | 34.6%                              |            |
|                   | Senior high school      | 15.9%              | 22.8%                              |            |
|                   | 3-year college          | 23.2%              | 14.6%                              |            |
|                   | ≥ 4-year college        | 56.7%              | 14.5%                              |            |
| CCP Member        | Yes                     | 19.1%              | 11.7%                              |            |
|                   | No                      | 80.9%              | 88.3%                              |            |
| Region            | Eastern China           | 63.9%              |                                    | 48.9%      |
|                   | Central China           | 20.1%              |                                    | 27.6%      |
|                   | Western China           | 16.0%              |                                    | 21.4%      |
| Occupation        | Student                 | 26.4%              |                                    | 26.9%      |
|                   | Self-employed           | 13.0%              |                                    | 20.3%      |
|                   | Corporate office worker | 24.4%              |                                    | 9.4%       |
|                   | Corporate management    | 6.7%               |                                    | 2.9%       |
|                   | Government employee     | 4.0%               |                                    | 3.8%       |
|                   | Government officials    | 0.2%               |                                    | 0.3%       |
|                   | Professional            | 11.6%              |                                    | 6.7%       |
|                   | Manufacturing worker    | 2.2%               |                                    | 3.5%       |
|                   | Service worker          | 4.9%               |                                    | 6.0%       |
|                   | Migrant worker          | 1.7%               |                                    | 3.8%       |
|                   | Farmer                  | 0%                 |                                    | 7.4%       |
|                   | Unemployed              | 3.8%               |                                    | 6.5%       |
| Retired and other | 1.1%                    |                    | 3.2%                               |            |

*Notes:* CFPS refers to China Family Panel Studies, a biennial longitudinal general social survey of China using multi-stage probability sampling. We use its “resampled sample” (sub-sample=1), which is nationally representative by design (see CFPS User’s Manual, 3rd Edition, <http://iiss.pku.edu.cn/cfps/docs/20200315092524928116.pdf>). We also only include respondents aged 18 and above from CFPS in order to make the data comparable to our study. “Internet active” respondents are those for whom the importance of the internet as an information source (qu802) is 4 or 5 on a scale from 1 to 5. The variable in CFPS used for education is “cfps2018sch,” urban/rural residence is “urban,” and CCP Member = Yes if “party” or “qn4001” is 1. CNNIC refers to China Internet Network Information Center, which conducts biannual surveys of Chinese internet users including children. Here we are using its July 2018 report (except regional distribution data, which was from the August 2019 report). Since our survey only includes adults, we use CFPS as the main benchmark, and use CNNIC for information not available in CFPS.

## Appendix.3 Regression Tables

Table S2: Regressions on Regime Support

|                    | <i>Self</i> Regime Support |                      | <i>Other</i> Regime Support |                     | Other-Self Difference |                      |
|--------------------|----------------------------|----------------------|-----------------------------|---------------------|-----------------------|----------------------|
|                    | (1)                        | (2)                  | (3)                         | (4)                 | (5)                   | (6)                  |
| Video              | 0.013<br>(0.019)           | 0.037**<br>(0.013)   | 0.102***<br>(0.020)         | 0.117***<br>(0.019) | 0.089***<br>(0.018)   | 0.080***<br>(0.017)  |
| Democracy          | 0.020<br>(0.018)           | 0.042**<br>(0.014)   | 0.061**<br>(0.021)          | 0.068***<br>(0.020) | 0.041*<br>(0.018)     | 0.026<br>(0.018)     |
| Book               | 0.041*<br>(0.017)          | 0.039**<br>(0.012)   | 0.090***<br>(0.020)         | 0.086***<br>(0.019) | 0.048**<br>(0.018)    | 0.047**<br>(0.018)   |
| Space              | 0.020<br>(0.018)           | 0.037**<br>(0.013)   | 0.092***<br>(0.021)         | 0.099***<br>(0.020) | 0.072***<br>(0.019)   | 0.062***<br>(0.019)  |
| Female             |                            | -0.032***<br>(0.009) |                             | -0.006<br>(0.012)   |                       | 0.026*<br>(0.011)    |
| Age Group          |                            | -0.001<br>(0.003)    |                             | 0.005<br>(0.004)    |                       | 0.006<br>(0.004)     |
| Education          |                            | 0.010*<br>(0.005)    |                             | -0.003<br>(0.007)   |                       | -0.012<br>(0.006)    |
| Income Level       |                            | 0.015***<br>(0.005)  |                             | 0.026***<br>(0.006) |                       | 0.011<br>(0.006)     |
| CCP Member         |                            | 0.004<br>(0.010)     |                             | -0.018<br>(0.015)   |                       | -0.022<br>(0.015)    |
| Urban              |                            | 0.004<br>(0.009)     |                             | -0.014<br>(0.013)   |                       | -0.017<br>(0.012)    |
| Life Satisfaction  |                            | 0.014**<br>(0.005)   |                             | 0.009<br>(0.007)    |                       | -0.005<br>(0.007)    |
| Political Interest |                            | -0.004<br>(0.006)    |                             | -0.001<br>(0.008)   |                       | 0.003<br>(0.008)     |
| National Pride     |                            | 0.092***<br>(0.009)  |                             | 0.064***<br>(0.012) |                       | -0.028*<br>(0.011)   |
| Pro West           |                            | -0.007<br>(0.007)    |                             | 0.013<br>(0.009)    |                       | 0.020*<br>(0.009)    |
| System Evaluation  |                            | 0.086***<br>(0.008)  |                             | 0.045***<br>(0.010) |                       | -0.041***<br>(0.010) |
| Constant           | 0.781***<br>(0.013)        | 0.028<br>(0.047)     | 0.710***<br>(0.016)         | 0.147*<br>(0.068)   | -0.071***<br>(0.014)  | 0.119<br>(0.064)     |
| Observations       | 895                        | 895                  | 895                         | 895                 | 895                   | 895                  |
| $R^2$              | 0.006                      | 0.502                | 0.037                       | 0.214               | 0.031                 | 0.126                |

*Notes:* The dependent variables respectively refer to the respondents' own regime support, their perceptions of other people's regime support, and the differences between their perceptions of other people's regime support and their own regime support. Self regime support and other regime support are re-scaled to range between 0 and 1. Robust standard errors in parentheses. \*\*\*  $p < 0.001$ , \*\*  $p < 0.01$ , \*  $p < 0.05$

Table S3: Regressions on Regime Support

|                    | <i>Self</i> Regime Support |                      | <i>Other</i> Regime Support |                     | Other-Self Difference |                      |
|--------------------|----------------------------|----------------------|-----------------------------|---------------------|-----------------------|----------------------|
|                    | (1)                        | (2)                  | (3)                         | (4)                 | (5)                   | (6)                  |
| TREATED            | 0.024<br>(0.014)           | 0.039***<br>(0.010)  | 0.086***<br>(0.017)         | 0.092***<br>(0.016) | 0.061***<br>(0.015)   | 0.053***<br>(0.015)  |
| Female             |                            | -0.032***<br>(0.009) |                             | -0.007<br>(0.012)   |                       | 0.025*<br>(0.011)    |
| Age Group          |                            | -0.001<br>(0.003)    |                             | 0.004<br>(0.004)    |                       | 0.005<br>(0.004)     |
| Education          |                            | 0.010*<br>(0.005)    |                             | -0.001<br>(0.007)   |                       | -0.011<br>(0.006)    |
| Income Level       |                            | 0.015***<br>(0.004)  |                             | 0.025***<br>(0.006) |                       | 0.009<br>(0.006)     |
| CCP Member         |                            | 0.004<br>(0.010)     |                             | -0.017<br>(0.015)   |                       | -0.021<br>(0.015)    |
| Urban              |                            | 0.004<br>(0.009)     |                             | -0.014<br>(0.013)   |                       | -0.017<br>(0.012)    |
| Life Satisfaction  |                            | 0.014**<br>(0.005)   |                             | 0.010<br>(0.007)    |                       | -0.004<br>(0.007)    |
| Political Interest |                            | -0.004<br>(0.006)    |                             | -0.002<br>(0.008)   |                       | 0.002<br>(0.008)     |
| National Pride     |                            | 0.092***<br>(0.009)  |                             | 0.064***<br>(0.012) |                       | -0.029*<br>(0.011)   |
| Pro West           |                            | -0.007<br>(0.007)    |                             | 0.013<br>(0.009)    |                       | 0.020*<br>(0.009)    |
| System Evaluation  |                            | 0.086***<br>(0.008)  |                             | 0.045***<br>(0.010) |                       | -0.041***<br>(0.010) |
| Constant           | 0.781***<br>(0.013)        | 0.028<br>(0.047)     | 0.710***<br>(0.016)         | 0.150*<br>(0.068)   | -0.071***<br>(0.014)  | 0.122<br>(0.064)     |
| Observations       | 895                        | 895                  | 895                         | 895                 | 895                   | 895                  |
| $R^2$              | 0.003                      | 0.502                | 0.032                       | 0.207               | 0.021                 | 0.115                |

*Notes:* The dependent variables respectively refer to the respondents' own regime support, their perceptions of other people's regime support, and the differences between their perceptions of other people's regime support and their own regime support. Self regime support and other regime support are re-scaled to range between 0 and 1. Robust standard errors in parentheses. "TREATED" equals 1 for respondents in any treatment group and 0 otherwise. \*\*\*  $p < 0.001$ , \*\*  $p < 0.01$ , \*  $p < 0.05$

Table S4: Regressions on Assessment of Regime Stability

|                    | <i>Self</i> Regime Stability |                      | <i>Other</i> Regime Stability |                      | Other-Self Difference |                    |
|--------------------|------------------------------|----------------------|-------------------------------|----------------------|-----------------------|--------------------|
|                    | (1)                          | (2)                  | (3)                           | (4)                  | (5)                   | (6)                |
| Video              | 0.016<br>(0.020)             | 0.023<br>(0.018)     | 0.078***<br>(0.021)           | 0.083***<br>(0.020)  | 0.063**<br>(0.019)    | 0.059**<br>(0.019) |
| Democracy          | 0.018<br>(0.019)             | 0.024<br>(0.018)     | 0.058**<br>(0.021)            | 0.058**<br>(0.021)   | 0.041*<br>(0.020)     | 0.035<br>(0.020)   |
| Book               | 0.012<br>(0.019)             | 0.007<br>(0.018)     | 0.060**<br>(0.021)            | 0.055**<br>(0.020)   | 0.048*<br>(0.020)     | 0.047*<br>(0.020)  |
| Space              | 0.018<br>(0.020)             | 0.018<br>(0.019)     | 0.081***<br>(0.023)           | 0.076***<br>(0.022)  | 0.062**<br>(0.022)    | 0.058**<br>(0.022) |
| Female             |                              | -0.078***<br>(0.012) |                               | -0.047***<br>(0.013) |                       | 0.031*<br>(0.012)  |
| Age Group          |                              | 0.006<br>(0.004)     |                               | 0.011*<br>(0.004)    |                       | 0.006<br>(0.004)   |
| Education          |                              | 0.013*<br>(0.006)    |                               | 0.012<br>(0.007)     |                       | -0.001<br>(0.007)  |
| Income Level       |                              | 0.007<br>(0.007)     |                               | 0.015*<br>(0.008)    |                       | 0.009<br>(0.007)   |
| CCP Member         |                              | -0.004<br>(0.015)    |                               | -0.023<br>(0.016)    |                       | -0.018<br>(0.017)  |
| Urban              |                              | 0.004<br>(0.012)     |                               | -0.007<br>(0.014)    |                       | -0.011<br>(0.013)  |
| Life Satisfaction  |                              | 0.003<br>(0.006)     |                               | 0.003<br>(0.007)     |                       | 0.001<br>(0.007)   |
| Political Interest |                              | 0.006<br>(0.009)     |                               | 0.004<br>(0.009)     |                       | -0.002<br>(0.009)  |
| National Pride     |                              | 0.031**<br>(0.011)   |                               | 0.019<br>(0.011)     |                       | -0.012<br>(0.012)  |
| Pro-West           |                              | 0.002<br>(0.008)     |                               | 0.014<br>(0.009)     |                       | 0.012<br>(0.009)   |
| System Evaluation  |                              | 0.052***<br>(0.010)  |                               | 0.039***<br>(0.010)  |                       | -0.013<br>(0.010)  |
| Constant           | 0.819***<br>(0.014)          | 0.430***<br>(0.064)  | 0.747***<br>(0.016)           | 0.359***<br>(0.070)  | -0.071***<br>(0.015)  | -0.071<br>(0.065)  |
| Observations       | 895                          | 895                  | 895                           | 895                  | 895                   | 895                |
| $R^2$              | 0.001                        | 0.158                | 0.022                         | 0.107                | 0.016                 | 0.037              |

*Notes:* The dependent variables respectively refer to the respondents' own assessment of regime stability, their perceptions of other people's assessment of regime stability, and the differences between respondent's perceptions of other people's assessment of regime stability and their own assessment of regime stability. Self regime stability and other regime stability are re-scaled to range between 0 and 1. Robust standard errors in parentheses. \*\*\*  $p < 0.001$ , \*\*  $p < 0.01$ , \*  $p < 0.05$

Table S5: Regressions on Assessment of Regime Stability

|                    | <i>Self</i> Regime Stability |                      | <i>Other</i> Regime Stability |                      | Other-Self Difference |                    |
|--------------------|------------------------------|----------------------|-------------------------------|----------------------|-----------------------|--------------------|
|                    | (1)                          | (2)                  | (3)                           | (4)                  | (5)                   | (6)                |
| TREATED            | 0.016<br>(0.016)             | 0.017<br>(0.015)     | 0.069***<br>(0.018)           | 0.067***<br>(0.017)  | 0.053**<br>(0.017)    | 0.049**<br>(0.017) |
| Female             |                              | -0.078***<br>(0.012) |                               | -0.047***<br>(0.013) |                       | 0.031*<br>(0.012)  |
| Age Group          |                              | 0.005<br>(0.004)     |                               | 0.011*<br>(0.004)    |                       | 0.005<br>(0.004)   |
| Education          |                              | 0.013*<br>(0.006)    |                               | 0.013<br>(0.007)     |                       | -0.0004<br>(0.007) |
| Income Level       |                              | 0.007<br>(0.007)     |                               | 0.015*<br>(0.007)    |                       | 0.008<br>(0.007)   |
| CCP Member         |                              | -0.005<br>(0.015)    |                               | -0.023<br>(0.016)    |                       | -0.018<br>(0.017)  |
| Urban              |                              | 0.004<br>(0.012)     |                               | -0.007<br>(0.014)    |                       | -0.011<br>(0.013)  |
| Life Satisfaction  |                              | 0.002<br>(0.006)     |                               | 0.004<br>(0.007)     |                       | 0.001<br>(0.007)   |
| Political Interest |                              | 0.006<br>(0.009)     |                               | 0.003<br>(0.009)     |                       | -0.002<br>(0.009)  |
| National Pride     |                              | 0.031**<br>(0.011)   |                               | 0.018<br>(0.011)     |                       | -0.012<br>(0.012)  |
| Pro West           |                              | 0.002<br>(0.008)     |                               | 0.015<br>(0.009)     |                       | 0.012<br>(0.009)   |
| System Evaluation  |                              | 0.052***<br>(0.010)  |                               | 0.039***<br>(0.010)  |                       | -0.013<br>(0.010)  |
| Constant           | 0.819***<br>(0.014)          | 0.434***<br>(0.064)  | 0.747***<br>(0.016)           | 0.362***<br>(0.069)  | -0.071***<br>(0.015)  | -0.072<br>(0.064)  |
| Observations       | 895                          | 895                  | 895                           | 895                  | 895                   | 895                |
| $R^2$              | 0.001                        | 0.157                | 0.020                         | 0.104                | 0.014                 | 0.035              |

*Notes:* The dependent variables respectively refer to the respondents' own assessment of regime stability, their perceptions of other people's assessment of regime stability, and the differences between respondent's perceptions of other people's assessment of regime stability and their own assessment of regime stability. Self regime stability and other regime stability are re-scaled to range between 0 and 1. "TREATED" equals 1 for respondents in any treatment group and 0 otherwise. Robust standard errors in parentheses. \*\*\*  $p < 0.001$ , \*\*  $p < 0.01$ , \*  $p < 0.05$

Table S6: Regressions on Willingness to Protest

|                    | <i>Self</i> Protest |                     | <i>Other</i> Protest |                     | Other-Self Difference |                      |
|--------------------|---------------------|---------------------|----------------------|---------------------|-----------------------|----------------------|
|                    | (1)                 | (2)                 | (3)                  | (4)                 | (5)                   | (6)                  |
| Video              | -0.010<br>(0.026)   | -0.010<br>(0.025)   | -0.060*<br>(0.025)   | -0.062*<br>(0.024)  | -0.050*<br>(0.023)    | -0.052*<br>(0.022)   |
| Democracy          | -0.007<br>(0.025)   | -0.018<br>(0.025)   | -0.050*<br>(0.024)   | -0.056*<br>(0.024)  | -0.043<br>(0.024)     | -0.037<br>(0.024)    |
| Book               | 0.016<br>(0.026)    | 0.012<br>(0.024)    | -0.043<br>(0.024)    | -0.048*<br>(0.024)  | -0.059*<br>(0.024)    | -0.060**<br>(0.023)  |
| Space              | 0.024<br>(0.026)    | 0.024<br>(0.025)    | -0.058*<br>(0.025)   | -0.058*<br>(0.026)  | -0.082***<br>(0.024)  | -0.082***<br>(0.024) |
| Female             |                     | -0.007<br>(0.016)   |                      | -0.006<br>(0.016)   |                       | 0.001<br>(0.014)     |
| Age Group          |                     | -0.003<br>(0.006)   |                      | -0.006<br>(0.006)   |                       | -0.002<br>(0.005)    |
| Education          |                     | -0.030**<br>(0.009) |                      | -0.012<br>(0.009)   |                       | 0.018*<br>(0.009)    |
| Income Level       |                     | 0.022**<br>(0.009)  |                      | 0.019*<br>(0.009)   |                       | -0.003<br>(0.009)    |
| CCP Member         |                     | -0.049*<br>(0.021)  |                      | -0.026<br>(0.021)   |                       | 0.023<br>(0.020)     |
| Urban              |                     | -0.052**<br>(0.017) |                      | -0.035*<br>(0.017)  |                       | 0.018<br>(0.016)     |
| Life Satisfaction  |                     | 0.012<br>(0.009)    |                      | 0.017<br>(0.009)    |                       | 0.006<br>(0.009)     |
| Political Interest |                     | 0.013<br>(0.011)    |                      | -0.002<br>(0.011)   |                       | -0.016<br>(0.010)    |
| National Pride     |                     | 0.019<br>(0.015)    |                      | -0.002<br>(0.014)   |                       | -0.021<br>(0.014)    |
| Pro-West           |                     | 0.048***<br>(0.013) |                      | 0.012<br>(0.013)    |                       | -0.036**<br>(0.012)  |
| System Evaluation  |                     | -0.020<br>(0.013)   |                      | 0.002<br>(0.013)    |                       | 0.023<br>(0.013)     |
| Constant           | 0.344***<br>(0.018) | 0.214*<br>(0.085)   | 0.437***<br>(0.017)  | 0.363***<br>(0.085) | 0.093***<br>(0.017)   | 0.149<br>(0.079)     |
| Observations       | 895                 | 895                 | 895                  | 895                 | 895                   | 895                  |
| $R^2$              | 0.003               | 0.083               | 0.009                | 0.040               | 0.015                 | 0.049                |

*Note:* The dependent variables respectively refer to the respondents' own willingness to protest, their perceptions of other people's willingness to protest, and the differences between other people's presumed willingness to protest and the respondents' own willingness to protest. Self protest and other protest are re-scaled to range between 0 and 1. Robust standard errors in parentheses. \*\*\*  $p < 0.001$ , \*\*  $p < 0.01$ , \*  $p < 0.05$

Table S7: Regressions on Willingness to Protest

|                    | <i>Self</i> Protest |                     | <i>Other</i> Protest |                     | Other-Self Difference |                     |
|--------------------|---------------------|---------------------|----------------------|---------------------|-----------------------|---------------------|
|                    | (1)                 | (2)                 | (3)                  | (4)                 | (5)                   | (6)                 |
| Treated            | 0.006<br>(0.020)    | 0.002<br>(0.020)    | -0.052**<br>(0.019)  | -0.056**<br>(0.019) | -0.058**<br>(0.019)   | -0.058**<br>(0.019) |
| Female             |                     | -0.007<br>(0.016)   |                      | -0.006<br>(0.016)   |                       | 0.002<br>(0.014)    |
| Age Group          |                     | -0.003<br>(0.006)   |                      | -0.005<br>(0.006)   |                       | -0.002<br>(0.005)   |
| Education          |                     | -0.029**<br>(0.009) |                      | -0.012<br>(0.009)   |                       | 0.017<br>(0.009)    |
| Income Level       |                     | 0.022**<br>(0.009)  |                      | 0.019*<br>(0.009)   |                       | -0.003<br>(0.008)   |
| CCP Member         |                     | -0.048*<br>(0.021)  |                      | -0.025<br>(0.021)   |                       | 0.023<br>(0.020)    |
| Urban              |                     | -0.053**<br>(0.017) |                      | -0.035*<br>(0.017)  |                       | 0.018<br>(0.016)    |
| Life Satisfaction  |                     | 0.011<br>(0.009)    |                      | 0.018<br>(0.009)    |                       | 0.006<br>(0.009)    |
| Political Interest |                     | 0.013<br>(0.011)    |                      | -0.002<br>(0.011)   |                       | -0.015<br>(0.010)   |
| National Pride     |                     | 0.021<br>(0.014)    |                      | -0.002<br>(0.014)   |                       | -0.023<br>(0.013)   |
| Pro West           |                     | 0.048***<br>(0.013) |                      | 0.012<br>(0.013)    |                       | -0.036**<br>(0.012) |
| System Evaluation  |                     | -0.021<br>(0.013)   |                      | 0.002<br>(0.013)    |                       | 0.023<br>(0.013)    |
| Constant           | 0.344***<br>(0.018) | 0.205*<br>(0.084)   | 0.437***<br>(0.017)  | 0.360***<br>(0.085) | 0.093***<br>(0.017)   | 0.156*<br>(0.079)   |
| Observations       | 895                 | 895                 | 895                  | 895                 | 895                   | 895                 |
| $R^2$              | 0.0001              | 0.080               | 0.008                | 0.040               | 0.011                 | 0.045               |

*Note:* The dependent variables respectively refer to the respondents' own willingness to protest, their perceptions of other people's willingness to protest, and the differences between other people's presumed willingness to protest and the respondents' own willingness to protest. Self protest and other protest are re-scaled to range between 0 and 1. "TREATED" equals 1 for respondents in any treatment group and 0 otherwise. Robust standard errors in parentheses. \*\*\*  $p < 0.001$ , \*\*  $p < 0.01$ , \*  $p < 0.05$

Table S8: Treatments Interacted with Education

|                    | <i>Self</i><br>Support<br>(1) | <i>Other</i><br>Support<br>(2) | <i>Self</i><br>Stability<br>(3) | <i>Other</i><br>Stability<br>(4) | <i>Self</i><br>Protest<br>(5) | <i>Other</i><br>Protest<br>(6) |
|--------------------|-------------------------------|--------------------------------|---------------------------------|----------------------------------|-------------------------------|--------------------------------|
| Video              | 0.021<br>(0.022)              | 0.107***<br>(0.030)            | 0.027<br>(0.029)                | 0.122***<br>(0.033)              | -0.014<br>(0.037)             | -0.032<br>(0.039)              |
| Democracy          | 0.034<br>(0.021)              | 0.066*<br>(0.031)              | 0.017<br>(0.027)                | 0.084*<br>(0.033)                | -0.021<br>(0.037)             | -0.040<br>(0.037)              |
| Book               | 0.039*<br>(0.017)             | 0.104***<br>(0.028)            | -0.0093<br>(0.028)              | 0.069*<br>(0.034)                | 0.018<br>(0.037)              | -0.016<br>(0.036)              |
| Space              | 0.039<br>(0.024)              | 0.104***<br>(0.030)            | 0.028<br>(0.032)                | 0.125***<br>(0.036)              | -0.020<br>(0.042)             | -0.069<br>(0.044)              |
| Video_College      | 0.030<br>(0.027)              | 0.018<br>(0.039)               | -0.005<br>(0.038)               | -0.069<br>(0.041)                | 0.003<br>(0.049)              | -0.055<br>(0.049)              |
| Democracy_College  | 0.014<br>(0.027)              | 0.005<br>(0.040)               | 0.011<br>(0.036)                | -0.047<br>(0.042)                | 0.006<br>(0.049)              | -0.027<br>(0.049)              |
| Book_College       | 0.0005<br>(0.024)             | -0.033<br>(0.038)              | 0.031<br>(0.036)                | -0.024<br>(0.042)                | -0.013<br>(0.050)             | -0.057<br>(0.048)              |
| Space_College      | -0.002<br>(0.029)             | -0.009<br>(0.039)              | -0.014<br>(0.039)               | -0.080<br>(0.045)                | 0.069<br>(0.053)              | 0.013<br>(0.054)               |
| College            | 0.011<br>(0.019)              | -0.001<br>(0.030)              | 0.017<br>(0.027)                | 0.063<br>(0.033)                 | -0.059<br>(0.036)             | 0.003<br>(0.036)               |
| Female             | -0.032***<br>(0.009)          | -0.006<br>(0.012)              | -0.077***<br>(0.012)            | -0.045***<br>(0.013)             | -0.009<br>(0.016)             | -0.007<br>(0.016)              |
| Age Group          | -0.0004<br>(0.003)            | 0.004<br>(0.004)               | 0.007<br>(0.004)                | 0.012**<br>(0.004)               | -0.005<br>(0.006)             | -0.006<br>(0.006)              |
| Income Level       | 0.016***<br>(0.005)           | 0.026***<br>(0.006)            | 0.007<br>(0.007)                | 0.016*<br>(0.007)                | 0.021*<br>(0.009)             | 0.019*<br>(0.009)              |
| CCP Member         | 0.004<br>(0.010)              | -0.016<br>(0.016)              | -0.006<br>(0.015)               | -0.023<br>(0.016)                | -0.048*<br>(0.021)            | -0.023<br>(0.021)              |
| Urban              | 0.003<br>(0.009)              | -0.014<br>(0.013)              | 0.004<br>(0.013)                | -0.007<br>(0.014)                | -0.053**<br>(0.017)           | -0.033*<br>(0.017)             |
| Life Satisfaction  | 0.015**<br>(0.005)            | 0.009<br>(0.007)               | 0.003<br>(0.006)                | 0.003<br>(0.007)                 | 0.011<br>(0.009)              | 0.016<br>(0.009)               |
| Political Interest | -0.004<br>(0.006)             | -0.0003<br>(0.008)             | 0.005<br>(0.009)                | 0.003<br>(0.009)                 | 0.015<br>(0.011)              | -0.001<br>(0.011)              |
| National Pride     | 0.092***<br>(0.009)           | 0.065***<br>(0.012)            | 0.030**<br>(0.011)              | 0.019<br>(0.011)                 | 0.020<br>(0.015)              | -0.001<br>(0.014)              |
| Pro West           | -0.006<br>(0.007)             | 0.014<br>(0.009)               | 0.002<br>(0.008)                | 0.014<br>(0.009)                 | 0.048***<br>(0.013)           | 0.012<br>(0.013)               |
| System Evaluation  | 0.085***<br>(0.008)           | 0.044***<br>(0.010)            | 0.053***<br>(0.010)             | 0.039***<br>(0.010)              | -0.020<br>(0.013)             | 0.002<br>(0.013)               |
| Constant           | 0.062<br>(0.045)              | 0.133*<br>(0.066)              | 0.479***<br>(0.059)             | 0.378***<br>(0.067)              | 0.121<br>(0.081)              | 0.305***<br>(0.082)            |
| Observations       | 895                           | 895                            | 895                             | 895                              | 895                           | 895                            |
| $R^2$              | 0.503                         | 0.216                          | 0.159                           | 0.112                            | 0.082                         | 0.044                          |

Note: Robust standard errors in parentheses. \*\*\*  $p < 0.001$ , \*\*  $p < 0.01$ , \*  $p < 0.05$

Table S9: TREATED Interacted with Education

|                    | <i>Self</i><br>Support<br>(1) | <i>Other</i><br>Support<br>(2) | <i>Self</i><br>Stability<br>(3) | <i>Other</i><br>Stability<br>(4) | <i>Self</i><br>Protest<br>(5) | <i>Other</i><br>Protest<br>(6) |
|--------------------|-------------------------------|--------------------------------|---------------------------------|----------------------------------|-------------------------------|--------------------------------|
| TREATED            | 0.033*<br>(0.016)             | 0.094***<br>(0.025)            | 0.014<br>(0.022)                | 0.096***<br>(0.028)              | -0.008<br>(0.029)             | -0.037<br>(0.030)              |
| TREATED_College    | 0.010<br>(0.021)              | -0.004<br>(0.033)              | 0.007<br>(0.030)                | -0.051<br>(0.035)                | 0.016<br>(0.039)              | -0.034<br>(0.039)              |
| College            | 0.011<br>(0.019)              | -0.001<br>(0.030)              | 0.017<br>(0.027)                | 0.063<br>(0.033)                 | -0.058<br>(0.036)             | 0.003<br>(0.036)               |
| Female             | -0.032***<br>(0.009)          | -0.006<br>(0.012)              | -0.078***<br>(0.012)            | -0.046***<br>(0.013)             | -0.008<br>(0.016)             | -0.005<br>(0.016)              |
| Age Group          | -0.0002<br>(0.003)            | 0.004<br>(0.004)               | 0.006<br>(0.004)                | 0.012**<br>(0.004)               | -0.005<br>(0.006)             | -0.006<br>(0.006)              |
| Income Level       | 0.016***<br>(0.004)           | 0.025***<br>(0.006)            | 0.007<br>(0.007)                | 0.015*<br>(0.007)                | 0.021*<br>(0.009)             | 0.019*<br>(0.009)              |
| CCP Member         | 0.004<br>(0.010)              | -0.016<br>(0.015)              | -0.005<br>(0.015)               | -0.022<br>(0.016)                | -0.049*<br>(0.021)            | -0.024<br>(0.021)              |
| Urban              | 0.003<br>(0.009)              | -0.013<br>(0.013)              | 0.004<br>(0.013)                | -0.006<br>(0.014)                | -0.054**<br>(0.017)           | -0.034*<br>(0.017)             |
| Life Satisfaction  | 0.014**<br>(0.005)            | 0.010<br>(0.007)               | 0.003<br>(0.006)                | 0.003<br>(0.007)                 | 0.011<br>(0.009)              | 0.017<br>(0.009)               |
| Political Interest | -0.004<br>(0.006)             | -0.002<br>(0.008)              | 0.005<br>(0.009)                | 0.003<br>(0.009)                 | 0.014<br>(0.011)              | -0.002<br>(0.011)              |
| National Pride     | 0.092***<br>(0.009)           | 0.063***<br>(0.012)            | 0.030**<br>(0.011)              | 0.019<br>(0.011)                 | 0.021<br>(0.015)              | -0.001<br>(0.014)              |
| Pro West           | -0.007<br>(0.007)             | 0.013<br>(0.009)               | 0.003<br>(0.008)                | 0.015<br>(0.009)                 | 0.048***<br>(0.013)           | 0.012<br>(0.013)               |
| System Evaluation  | 0.086***<br>(0.008)           | 0.045***<br>(0.010)            | 0.052***<br>(0.010)             | 0.039***<br>(0.010)              | -0.021<br>(0.013)             | 0.002<br>(0.013)               |
| Constant           | 0.062<br>(0.044)              | 0.145*<br>(0.065)              | 0.478***<br>(0.059)             | 0.379***<br>(0.067)              | 0.123<br>(0.081)              | 0.309***<br>(0.082)            |
| Observations       | 895                           | 895                            | 895                             | 895                              | 895                           | 895                            |
| $R^2$              | 0.502                         | 0.207                          | 0.156                           | 0.106                            | 0.075                         | 0.041                          |

Note: Robust standard errors in parentheses. \*\*\*  $p < 0.001$ , \*\*  $p < 0.01$ , \*  $p < 0.05$

Table S10: Treatments Interacted with Income

|                       | <i>Self</i><br>Support<br>(1) | <i>Other</i><br>Support<br>(2) | <i>Self</i><br>Stability<br>(3) | <i>Other</i><br>Stability<br>(4) | <i>Self</i><br>Protest<br>(5) | <i>Other</i><br>Protest<br>(6) |
|-----------------------|-------------------------------|--------------------------------|---------------------------------|----------------------------------|-------------------------------|--------------------------------|
| Video                 | 0.041*<br>(0.019)             | 0.110***<br>(0.027)            | 0.016<br>(0.025)                | 0.078**<br>(0.028)               | 0.017<br>(0.033)              | -0.036<br>(0.035)              |
| Democracy             | 0.049*<br>(0.021)             | 0.068*<br>(0.029)              | 0.014<br>(0.026)                | 0.065*<br>(0.029)                | -0.011<br>(0.034)             | -0.086*<br>(0.035)             |
| Book                  | 0.027<br>(0.018)              | 0.099***<br>(0.026)            | 0.007<br>(0.026)                | 0.079**<br>(0.029)               | 0.044<br>(0.033)              | -0.028<br>(0.035)              |
| Space                 | 0.023<br>(0.020)              | 0.070*<br>(0.029)              | 0.005<br>(0.026)                | 0.053<br>(0.032)                 | 0.039<br>(0.034)              | -0.035<br>(0.037)              |
| Video_High Income     | -0.007<br>(0.026)             | 0.017<br>(0.038)               | 0.016<br>(0.038)                | 0.010<br>(0.040)                 | -0.058<br>(0.049)             | -0.056<br>(0.048)              |
| Democracy_High Income | -0.007<br>(0.027)             | 0.013<br>(0.040)               | 0.023<br>(0.037)                | -0.007<br>(0.041)                | -0.007<br>(0.050)             | 0.069<br>(0.048)               |
| Book_High Income      | 0.027<br>(0.024)              | -0.020<br>(0.038)              | 0.003<br>(0.036)                | -0.046<br>(0.041)                | -0.061<br>(0.050)             | -0.036<br>(0.048)              |
| Space_High Income     | 0.033<br>(0.026)              | 0.067<br>(0.039)               | 0.028<br>(0.038)                | 0.049<br>(0.044)                 | -0.025<br>(0.050)             | -0.039<br>(0.050)              |
| High Income           | 0.006<br>(0.019)              | 0.016<br>(0.030)               | -0.003<br>(0.029)               | 0.016<br>(0.032)                 | 0.041<br>(0.036)              | 0.015<br>(0.035)               |
| Female                | -0.032***<br>(0.009)          | -0.004<br>(0.012)              | -0.078***<br>(0.012)            | -0.045***<br>(0.013)             | -0.006<br>(0.017)             | -0.006<br>(0.016)              |
| Age Group             | -0.001<br>(0.003)             | 0.004<br>(0.004)               | 0.005<br>(0.004)                | 0.011*<br>(0.004)                | -0.003<br>(0.006)             | -0.005<br>(0.006)              |
| Education             | 0.0099*<br>(0.005)            | -0.002<br>(0.007)              | 0.013*<br>(0.006)               | 0.012<br>(0.007)                 | -0.030**<br>(0.009)           | -0.012<br>(0.009)              |
| CCP Member            | 0.003<br>(0.010)              | -0.015<br>(0.015)              | -0.003<br>(0.015)               | -0.020<br>(0.016)                | -0.046*<br>(0.022)            | -0.022<br>(0.022)              |
| Urban                 | 0.005<br>(0.009)              | -0.011<br>(0.013)              | 0.005<br>(0.013)                | -0.005<br>(0.014)                | -0.049**<br>(0.017)           | -0.030<br>(0.017)              |
| Life Satisfaction     | 0.018***<br>(0.005)           | 0.014*<br>(0.007)              | 0.003<br>(0.006)                | 0.007<br>(0.007)                 | 0.018*<br>(0.009)             | 0.024**<br>(0.009)             |
| Political Interest    | -0.002<br>(0.006)             | 0.002<br>(0.008)               | 0.006<br>(0.009)                | 0.006<br>(0.009)                 | 0.016<br>(0.011)              | -0.002<br>(0.011)              |
| National Pride        | 0.093***<br>(0.009)           | 0.066***<br>(0.012)            | 0.032**<br>(0.011)              | 0.021<br>(0.011)                 | 0.022<br>(0.015)              | -0.001<br>(0.014)              |
| Pro West              | -0.008<br>(0.007)             | 0.014<br>(0.009)               | 0.003<br>(0.008)                | 0.016<br>(0.010)                 | 0.049***<br>(0.013)           | 0.014<br>(0.013)               |
| System Evaluation     | 0.087***<br>(0.008)           | 0.047***<br>(0.011)            | 0.053***<br>(0.010)             | 0.041***<br>(0.010)              | -0.019<br>(0.013)             | 0.005<br>(0.013)               |
| Constant              | 0.071<br>(0.047)              | 0.208**<br>(0.070)             | 0.452***<br>(0.065)             | 0.384***<br>(0.068)              | 0.239**<br>(0.087)            | 0.390***<br>(0.087)            |
| Observations          | 895                           | 895                            | 895                             | 895                              | 895                           | 895                            |
| $R^2$                 | 0.499                         | 0.208                          | 0.158                           | 0.110                            | 0.079                         | 0.043                          |

Note: Robust standard errors in parentheses. \*\*\*  $p < 0.001$ , \*\*  $p < 0.01$ , \*  $p < 0.05$

Table S11: TREATED Interacted with Income

|                     | <i>Self</i><br>Support<br>(1) | <i>Other</i><br>Support<br>(2) | <i>Self</i><br>Stability<br>(3) | <i>Other</i><br>Stability<br>(4) | <i>Self</i><br>Protest<br>(5) | <i>Other</i><br>Protest<br>(6) |
|---------------------|-------------------------------|--------------------------------|---------------------------------|----------------------------------|-------------------------------|--------------------------------|
| TREATED             | 0.035*<br>(0.015)             | 0.087***<br>(0.022)            | 0.010<br>(0.020)                | 0.069**<br>(0.024)               | 0.023<br>(0.027)              | -0.045<br>(0.028)              |
| TREATED_High Income | 0.013<br>(0.020)              | 0.017<br>(0.032)               | 0.017<br>(0.031)                | -0.001<br>(0.035)                | -0.038<br>(0.039)             | -0.016<br>(0.038)              |
| High Income         | 0.006<br>(0.018)              | 0.015<br>(0.030)               | -0.002<br>(0.029)               | 0.016<br>(0.032)                 | 0.041<br>(0.036)              | 0.015<br>(0.035)               |
| Female              | -0.032***<br>(0.009)          | -0.006<br>(0.012)              | -0.078***<br>(0.012)            | -0.047***<br>(0.013)             | -0.006<br>(0.016)             | -0.005<br>(0.016)              |
| Age Group           | -0.001<br>(0.003)             | 0.004<br>(0.004)               | 0.005<br>(0.004)                | 0.011*<br>(0.004)                | -0.003<br>(0.006)             | -0.005<br>(0.006)              |
| Education Level     | 0.010*<br>(0.005)             | -0.001<br>(0.007)              | 0.013*<br>(0.006)               | 0.013<br>(0.007)                 | -0.029**<br>(0.009)           | -0.012<br>(0.009)              |
| CCP Member          | 0.004<br>(0.010)              | -0.017<br>(0.015)              | -0.005<br>(0.015)               | -0.023<br>(0.016)                | -0.048*<br>(0.022)            | -0.025<br>(0.021)              |
| Urban               | 0.006<br>(0.009)              | -0.011<br>(0.013)              | 0.005<br>(0.013)                | -0.005<br>(0.014)                | -0.050**<br>(0.017)           | -0.031<br>(0.017)              |
| Life Satisfaction   | 0.018***<br>(0.005)           | 0.015*<br>(0.006)              | 0.003<br>(0.006)                | 0.007<br>(0.007)                 | 0.018*<br>(0.009)             | 0.024**<br>(0.009)             |
| Political Interest  | -0.002<br>(0.006)             | 0.001<br>(0.008)               | 0.006<br>(0.009)                | 0.005<br>(0.009)                 | 0.016<br>(0.011)              | 0.0004<br>(0.011)              |
| National Pride      | 0.093***<br>(0.009)           | 0.065***<br>(0.012)            | 0.031**<br>(0.011)              | 0.020<br>(0.011)                 | 0.024<br>(0.014)              | 0.0003<br>(0.014)              |
| Pro West            | -0.007<br>(0.007)             | 0.013<br>(0.009)               | 0.002<br>(0.008)                | 0.015<br>(0.009)                 | 0.048***<br>(0.013)           | 0.012<br>(0.013)               |
| System Evaluation   | 0.087***<br>(0.008)           | 0.046***<br>(0.011)            | 0.052***<br>(0.010)             | 0.040***<br>(0.010)              | -0.020<br>(0.013)             | 0.004<br>(0.013)               |
| Constant            | 0.068<br>(0.047)              | 0.214**<br>(0.070)             | 0.458***<br>(0.065)             | 0.395***<br>(0.068)              | 0.232**<br>(0.086)            | 0.387***<br>(0.087)            |
| Observations        | 895                           | 895                            | 895                             | 895                              | 895                           | 895                            |
| $R^2$               | 0.497                         | 0.197                          | 0.157                           | 0.100                            | 0.073                         | 0.034                          |

Note: Robust standard errors in parentheses. \*\*\*  $p < 0.001$ , \*\*  $p < 0.01$ , \*  $p < 0.05$
